# Supplementary material for: Role of Nitric Oxide, Nitric Oxide Synthase, Soluble Guanylyl Cyclase, and cGMP‐Dependent Protein Kinase I in Mouse Stem Cell Cardiac Development
Source: Hindawi journal article supplement (doi:10.1155/2016/2868323), 2016-01-01
Supplement: f1 [file 2868323.f1.pdf]

Table 1S – Amplicon context sequences of primers used for Q-PCR

|                                                                         |                                                                                                                                                                                                                                                |
|-------------------------------------------------------------------------|------------------------------------------------------------------------------------------------------------------------------------------------------------------------------------------------------------------------------------------------|
| Mouse Glyceraldehyde-3-Phosphate Dehydrogenase (mGapdh)                 | TGGGAGTTGCTGTTGAAGTCGCAGGAGACAACCTGGTCTCAGTGTAGCCCAAGATGCCCTTCAGTGGGCCCTCAGATGCCTGCTTACCACCTTCTTGATGTCA                                                                                                                                        |
| Mouse Octamer-binding Transcription factor 4 (mOct4)                    | ATGCAAATCGGAGACCCTGGTGCAGGCCCGGAAGAGAAA<br>GCGAACTAGCATTGAGAACCCTGTGAGGTGGAGTCTGGAG<br>ACCATGTTTCTGAA                                                                                                                                          |
| Mouse Brachyury (mBrachyury)                                            | CCACCGGTCATCGCCCTACCCCAGCCCCTATGCTCATCGGA<br>ACAGCTCTCCAACCTATGCGGACAATTCATCTGCTTGTCTG<br>TCCATGCTGCAGTCCCATGATAACTGGTCTAGCCTCGGAGT                                                                                                            |
| Mouse Myocyte Enhancer factor 2C (mMef2c)                               | TTCAGATTACGAGGATAATGGATGAGCGTAACAGACAGGT<br>GACTTTTACGAAGAGGAAATTTGGATTGATGAAGAAGGT<br>TATGAGCTGAGCGTGTGCGACTGTG AGATTGCACTG                                                                                                                   |
| Mouse GATA binding protein 4 (mGata4)                                   | CTGGGACATGGAGCTGCTGTGCCCATAGTGAGATGACAGC<br>CCGGGCTCTGTCTTGATGGGGCGCATCTTCTACTGCTGCT<br>GCTGCTGCTAGTGGCATTGCTGGAGTTACCGCTGGAGGCA<br>CCACTGGAGGGAGGGAGGGTCTCACCAGCAGGACCTGCT<br>GGCGTCTTAGATTTATTCAGGTTCTTGGGCTTCCGTTTTCTG<br>GT                |
| Mouse NK2 transcription factor related, locus 5 (Drosophila), (mNkx2.5) | GTGGTCTCTCGGGCCATCCGTCTCGGCTTTGTCCAGCTCC<br>ACTGCCTTCTGCAGCGCGCACAGCTCTTTTTTATCCGCCCG<br>AGGGTCTTTGGCTGGGTGAGGGTACCCTAGGCTCCCGGG<br>TAAAATGTGGGGGCGGCTGGGAAAGCAGGAGAGCACTTG<br>GGGGCGAAGGCGCG                                                  |
| Mouse Nanog homeobox (mNanog)                                           | TCCAGCAGATGCAAGAACTCTCCTCCATTCTGAACCTGAGC<br>TATAAGCAGGTTAAGACCTGGTTTCAAACCAAAGGATGA<br>AGTGCAAGCGGTGGCAGAAAAACCAGTGGTTGAAGACTA<br>GCAATGGTCTGATTCAGAAGGGCT                                                                                    |
| Mouse Nitric Oxide Synthase 1 (neuronal) (mNos1)                        | GGCAACCATGAGGACCTCGTGAATGCACTCATTGAACGGC<br>TGGAGGACGCGCC<br>GCCTGCCAACACGTGGTGAAGGTGGAAATGCTGGAGGAA<br>AGGAACACGGCTC<br>TGGGTGTCATCAGTAATTGGAAGGATGAATCTCGCCTCC                                                                               |
| Mouse Nitric Oxide Synthase 2 (inducible) mNos2                         | ACCACACCAAACCTGTGTGCTGGAGGTTCTGGATGAGAGC<br>GGCAGCTACTGGG<br>TCAAAGACAAGAGGCTGCCCCCTGCTCACTCAGCCAAGC<br>CCTCACCTACTTCC TGGACATTACGACCCCTCCACCC                                                                                                 |
| Mouse Nitric Oxide Synthase 3 (endothelial) (mNos3)                     | GTCCTGTGCATGGATGAGTATGATGTGGTGTCCCTAGAGC<br>ACGAGGCACTGGTGTGGTGGTGACCAGCACATTTGGCAA<br>TGGGGATCCTCCGGAGAATGGAGAGAGCTTTGCAGCAGCG<br>CTCATGGAAATGTCAGGCCCGTACAACAGCTCCCCTAGGC<br>CTGAGCAGCACAAGAGCTACAAAATCCGATTCAACAGTGT<br>CTCCTGCTCAGACCC ACT |
| Mouse Protein Kinase, cGMP-dependent, type I (mPrkg1)                   | TATCATGTCAATCCCCCGCAGTATGATATTGTAGGTTTTCA<br>TTGGATCTGGGCT<br>GAGAAAGGTGGGCTGCCAGTCAGAAGCTCATACATCAGAA<br>TTCCTAGTGACCA                                                                                                                        |
| Mouse Guanylate cyclase 1, soluble, beta (mGuCy1b)                      | AGGCCAGCCAGTATGTAGAGAGCATGTTCCGAGCCTTCGA<br>CAAGAATGGGGACA<br>ACACCATTGACTTCTGGAGTATGTGGCAGCCCTGAACCTC<br>GTGCTG                                                                                                                               |

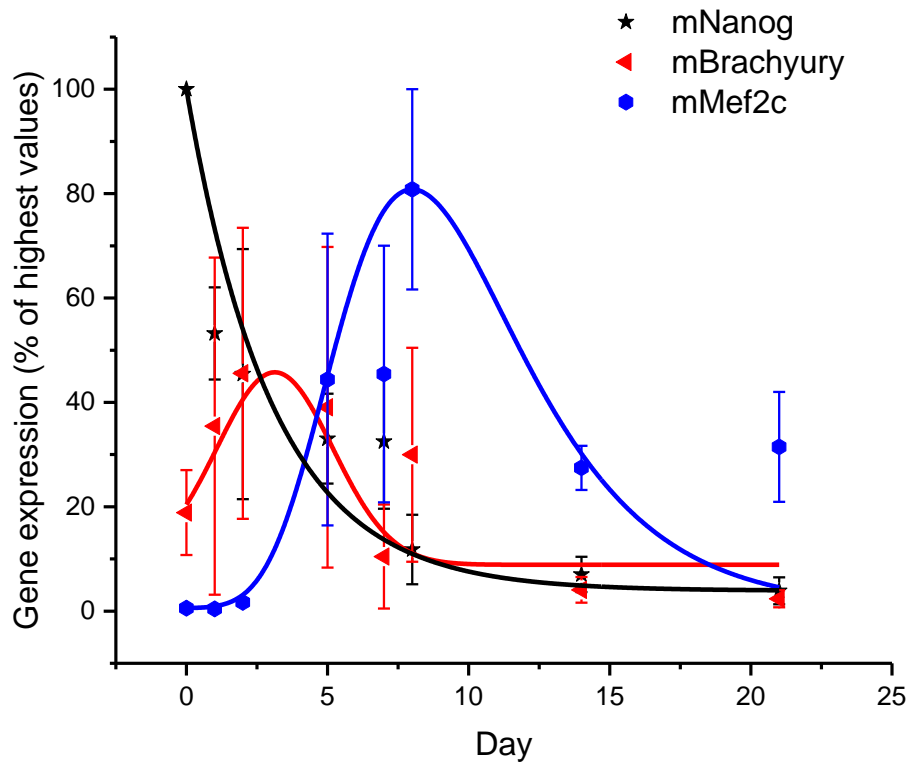

**Figure 1S. Time-course of gene expression in differentiating mEBs** - Relative expression of mNanog (pluripotency marker), mBrachyury (early mesodermic) and mMef2c (cardiac specific) genes. Data are the mean  $\pm$  s.e. of 3 differentiations; measures were performed in triplicate.

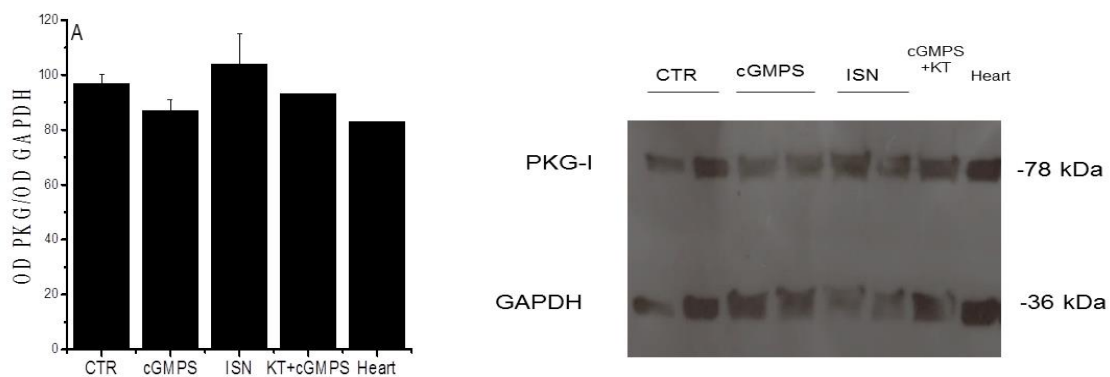

**Figure 2S - PKG-I protein expression in a single experimental preparation used to quantify protein phosphorylation** (see figure 4). Different drug treatments were performed as described in the method (scheme 2).

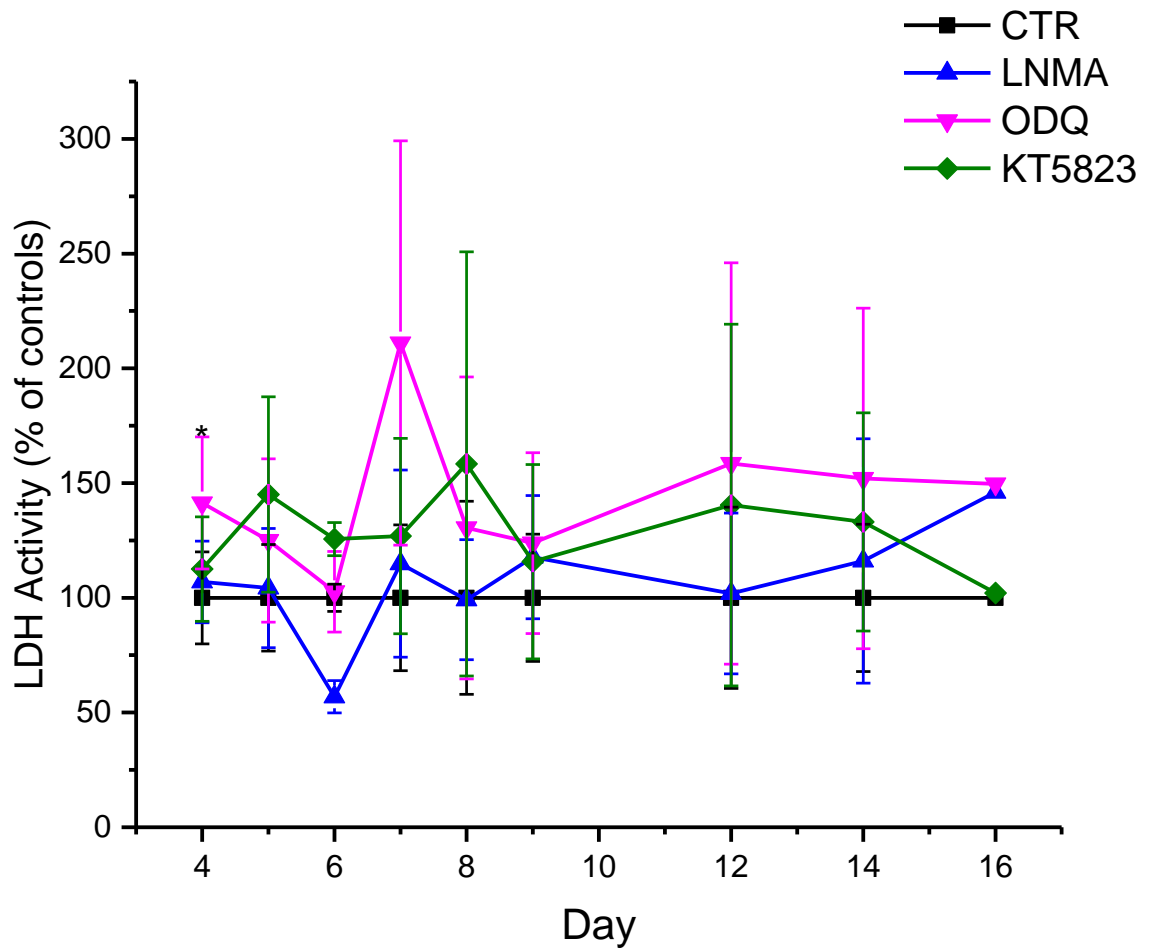

**Figure 3S - LDH release during mEBs cardiac differentiation** - LDH activity in conditioned medium of mEBs was measured in control conditions or in the presence of either 50  $\mu$ M ISN (NO-donor) or NOS/sGC/PKG-I pathway inhibitors (respectively, 100  $\mu$ M L-NMA, 1  $\mu$ M ODQ or 1  $\mu$ M KT5823) from day 0 to 16. Data are expressed as percentage of control values. \* $P < 0.05$  vs control, one way ANOVA followed by post-hoc Bonferroni's test. Data are the mean  $\pm$  s.e. of at least 3 different differentiations; measures were performed in duplicate.
